# Supplementary material for: The Association betweenC9orf72Repeats and Risk of Alzheimer’s Disease and Amyotrophic Lateral Sclerosis: A Meta-Analysis
Source: Hindawi journal article supplement (doi:10.1155/2016/5731734), 2016-01-01
Supplement: f1 [file 5731734.f1.zip]

Table 2  
Characteristics of the included studies for meta-analysis

| Study                           | Ethnicity | Country  | Age at onset<br>(years) | Case age/Control<br>age<br>(years) | Genotyping<br>method       | Cases(familial<br>/sporadic) | Controls(familial<br>/sporadic) | Cases carry C9<br>repeat<br>expansions(familial<br>/sporadic) | Cases carry C9<br>intermediate<br>repeats(familial<br>/sporadic) | Controls carry C9<br>repeat<br>expansions(familial<br>/sporadic) | Controls carry<br>C9 intermediate<br>repeats(familia<br>l/sporadic) | Diagnostic criteria | NOS score |
|---------------------------------|-----------|----------|-------------------------|------------------------------------|----------------------------|------------------------------|---------------------------------|---------------------------------------------------------------|------------------------------------------------------------------|------------------------------------------------------------------|---------------------------------------------------------------------|---------------------|-----------|
| Susan et<br>al. (2012)          | Caucasian | Ireland  |                         |                                    | rpPCR,<br>Southern<br>blot | 435 (49/386)                 | 188                             | 39 (20/19)                                                    |                                                                  | 0                                                                |                                                                     | El Escorial         | 7         |
| Beck et<br>al. (2013)           |           |          |                         |                                    | rpPCR,<br>Southern<br>blot | 360                          | 7579                            | 29                                                            |                                                                  | 11                                                               |                                                                     |                     | 4         |
| Chio et<br>al. (2012)           | Caucasian | Italy    |                         |                                    | rpPCR                      | 475 (36/439)                 | 245                             | 32 (24/8)                                                     |                                                                  | 0                                                                |                                                                     | El Escorial         | 7         |
| Debray et<br>al. (2013)         | Caucasian | Belgium  |                         |                                    | rpPCR                      | 590 (119/471)                | 384                             | 77 (32/45)                                                    |                                                                  | 0                                                                |                                                                     | revised El Escorial | 5         |
| Dombroski et<br>al. (2013)      | others    | Guam     |                         |                                    | rpPCR                      | 24                           | 43                              | 1                                                             |                                                                  | 0                                                                |                                                                     | El Escorial         | 7         |
| Garcia-Redondo<br>et al. (2013) | Caucasian | Spain    |                         |                                    | rpPCR                      | 936 (155/781)                | 248                             | 67 (42/25)                                                    | 0                                                                | 0                                                                | 0                                                                   | El Escorial         | 8         |
| Gijselinck et<br>al. (2012)     | Caucasian | Flanders |                         | 59.9±11.6/65.3±<br>14.8            | rpPCR                      | 137 (15/122)                 | 856                             | 13 (7/6)                                                      |                                                                  | 0                                                                |                                                                     | revised El Escorial | 8         |
| Harms et<br>al. (2013)          | Caucasian | US       |                         |                                    | rpPCR,<br>Southern         | 51/797                       | 526                             | 77 (22/55)                                                    |                                                                  | 2                                                                |                                                                     | El Escorial         | 8         |

| Table 1. Characteristics of the studies included in the meta-analysis |            |                             |                    |            |                            |                 |                    |                  |                     |
|-----------------------------------------------------------------------|------------|-----------------------------|--------------------|------------|----------------------------|-----------------|--------------------|------------------|---------------------|
| Study                                                                 | Population | Country                     | Age (years)        | Gender     | Method                     | Number of cases | Number of controls | Number of deaths | Number of survivors |
| Jiao et al. (2014)                                                    | Asian      | China                       | 41.1±11.5/39.7±8.9 | blot       | rpPCR                      | 110 (10/100)    | 150                | 1 (1/0)          | 0                   |
| Kenna et al. (2013)                                                   | Caucasian  | Irish                       | 61.7±12.0          | /60.3±11.8 | high throughput sequencing | 444 (50/394)    | 311                | 39 (15/24)       | 0                   |
| Konno et al. (2013)                                                   | Asian      | Japanese                    |                    |            | rpPCR                      | 168 (58/110)    | 180                | 2 (2/0)          | 0                   |
| Millecamps et al. (2012)                                              | Caucasian  | French                      |                    |            | rpPCR                      | 950 (225/725)   | 580                | 162 (104/58)     | 0                   |
| Ogaki et al. (2012)                                                   | Asian      | Japanese                    | 60.4±11.7          | /60.6±10.3 | rpPCR                      | 563 (11/552)    | 197                | 2 (0/2)          | 0                   |
| Ratti et al. (2012)                                                   | Caucasian  | Italy                       | 57.1±12.7          |            | rpPCR                      | 1534 (259/1275) | 862                | 128 (62/66)      | 2                   |
| Sabatelli et al. (2012)                                               | Caucasian  | Italy                       |                    |            | rpPCR                      | /1757           | 619                | 69 (0/69)        | 0                   |
| Tsai et al. (2012)                                                    | Asian      | China                       |                    |            | rpPCR                      | 124 (22/102)    | 300                | 6 (4/2)          | 0                   |
| van Rheenen et al. (2012)                                             | Caucasian  | Netherlands                 | /63.1±11.8         |            | rpPCR                      | 1500 (78/1422)  | 768                | 120 (33/87)      | 0                   |
| Xi et al. (2012)                                                      | Caucasian  | or North American countries | 57.6±12.3          | /70.2±9.5  | rpPCR                      | 389 (47/342)    | 602                | 36 (18/18)       | 0                   |

|                              |           |                  |             |       |               |      |            |   |                     |   |
|------------------------------|-----------|------------------|-------------|-------|---------------|------|------------|---|---------------------|---|
| Borghero et al. (2014)       | Caucasian | Italy            | 61.1±12.1/  | rpPCR | 375 (100/275) | 700  | 51 (33/18) | 0 | revised El Escorial | 8 |
| Brettschneider et al. (2012) | Caucasian | America          | 55–69/60–78 | rpPCR | 75 (13/62)    | 11   | 14 (6/8)   | 0 | revised El Escorial | 7 |
| Cooper–Knock et al. (2012)   | Caucasian | Northern England |             | rpPCR | 563 (63/500)  | 361  | 62 (27/35) | 0 | El Escorial         | 8 |
| Laere et al. (2014)          | Caucasian | Belgium          | 60.4±12.6   | rpPCR | 70            | 20   | 11         | 0 | revised El Escorial | 8 |
| Rutherford et al. (2012)     | Caucasian | America, British |             | rpPCR | 995           | 1444 | 211        | 0 | El Escorial         | 8 |
| Zou et al. (2013)            | Asian     | China            |             | rpPCR | 344 (20/324)  | 245  | 0          | 0 | El Escorial         | 8 |
