# Supplementary material for: The Association betweenC9orf72Repeats and Risk of Alzheimer’s Disease and Amyotrophic Lateral Sclerosis: A Meta-Analysis
Source: Hindawi journal article supplement (doi:10.1155/2016/5731734), 2016-01-01
Supplement: f1 [file 5731734.f1.zip]

Table 1  
Characteristics of the included studies for meta-analysis

| Study                   | Ethnicity | Country                                        | Age at onset (years) | Case age /Control age (years) | Genotyping method    | Cases(familial /sporadic) | Controls(familial /sporadic) | Cases carry C9 repeat expansions(familial /sporadic) | Cases carry C9 intermediate repeats(familial /sporadic) | Controls carry C9 repeat expansions(familial /sporadic) | Controls carry C9 intermediate repeats(familial /sporadic) | Diagnostic criteria | NOS score |
|-------------------------|-----------|------------------------------------------------|----------------------|-------------------------------|----------------------|---------------------------|------------------------------|------------------------------------------------------|---------------------------------------------------------|---------------------------------------------------------|------------------------------------------------------------|---------------------|-----------|
| Majounie et al. (2012)  |           |                                                | 60–97                |                               | rpPCR                | 771 (771/0)               | 223                          | 6                                                    |                                                         | 2                                                       |                                                            | NINCDS-ADRDA        | 5         |
| Rogaeva et al. (2012)   | Caucasian | European countries or North American countries | 72.1±9.4             |                               | rpPCR                | 424 (167/257)             | 602                          | 0                                                    | 4                                                       | 0                                                       | 6                                                          | NINCDS-ADRDA        | 7         |
| Rollinson et al. (2012) |           |                                                |                      | 37–90/26–78                   | rpPCR                | 568                       | 314                          | 0                                                    | 1                                                       | 0                                                       |                                                            | NINCDS-ADRDA        | 4         |
| Wojtas et al. (2012)    | Caucasian |                                                | 59.8±7.0             |                               | rpPCR                | 227 (128/99)              | 641                          | 2                                                    |                                                         | 0                                                       |                                                            | NINCDS-ADRDA        | 5         |
| Beck et al. (2013)      |           |                                                |                      |                               | rpPCR, Southern blot | 904                       | 7579                         | 11                                                   |                                                         | 11                                                      |                                                            |                     | 4         |
| Cacace et al. (2013)    | Caucasian | Flanders                                       | 74.5±8.9             | /65.1±13.6                    | rpPCR                | 1217                      | 1119                         | 5 (4/)                                               |                                                         | 0                                                       |                                                            | NINCDS-ADRDA        | 7         |
| Harms et                |           |                                                |                      | 75.8±                         | rpPCR,               | 872 (872/0)               | 888                          | 5 (5/)                                               |                                                         | 1 (1/)                                                  |                                                            | NINCDS-ADRDA        | 8         |

|                     |                    |                                               |                       |                             |               |            |          |   |          |   |        |              |   |  |                       |  |  |
|---------------------|--------------------|-----------------------------------------------|-----------------------|-----------------------------|---------------|------------|----------|---|----------|---|--------|--------------|---|--|-----------------------|--|--|
| al. (2013)          |                    |                                               |                       | 8.9/71.41<br>±6.7           | southern blot |            |          |   |          |   |        |              |   |  |                       |  |  |
| Jiao et al. (2013)  | Asian              | China                                         | 70.1±10.0             | 72.4±12.0/57.1±13.7         | rpPCR         | 279(0/279) | 314      | 0 | 0        | 0 | 0      | NINCDS-ADRDA | 6 |  |                       |  |  |
| Kohli et al. (2013) | Caucasian /African | European countries/African American countries | 70.84±8.34/73.08±8.65 | 73.39±7.71/69.54±6.83       | rpPCR         | 1184/291   | 1039/620 |   | 11(11/0) |   | 0(0/0) | NINCDS-ADRDA | 8 |  | /:different countries |  |  |
| Lin et al. (2014)   | Asian              | China                                         | 55.0±4.5              | 64.1±4.5、50.6±4.2/60.6±11.9 | rpPCR         | 68(0/61+7) | 485      | 0 | 0        | 0 | 1      | NINCDS-ADRDA | 4 |  |                       |  |  |
