# Supplementary material for: The Association betweenC9orf72Repeats and Risk of Alzheimer’s Disease and Amyotrophic Lateral Sclerosis: A Meta-Analysis
Source: Hindawi journal article supplement (doi:10.1155/2016/5731734), 2016-01-01
Supplement: f1 [file 5731734.f1.zip]

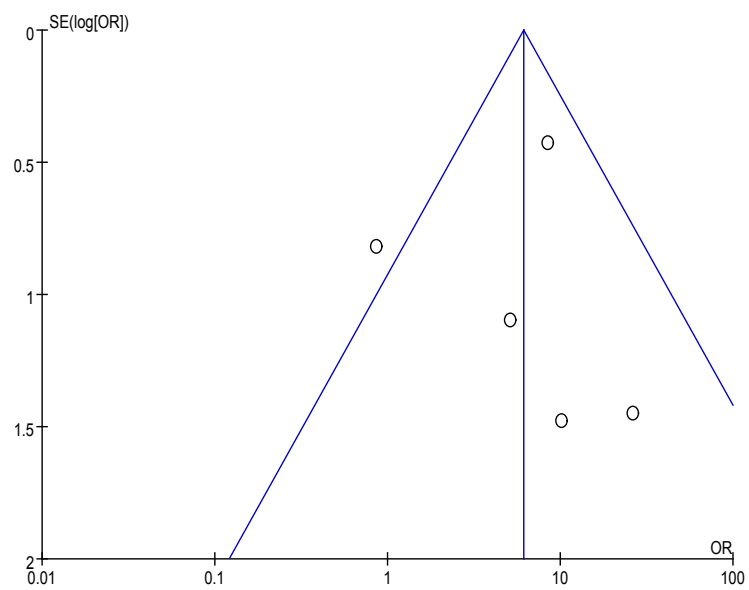

Fig. 3. (A) Funnel plot of the association between *C9orf72* repeat expansions and AD

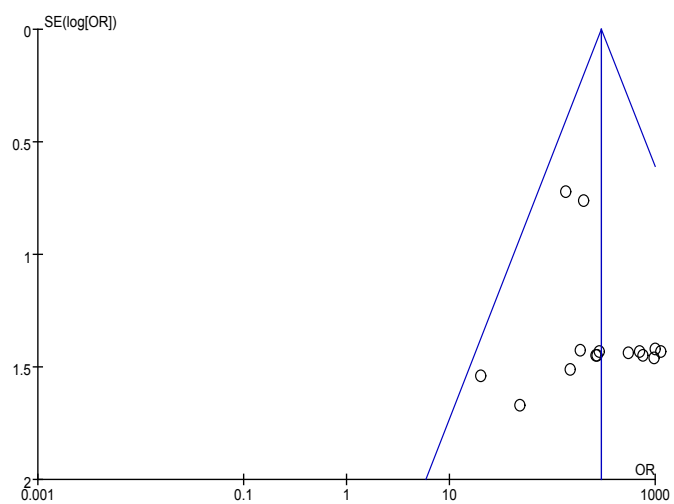

Fig. 3. (B) Funnel plot of the association between *C9orf72* repeat expansions and familial ALS

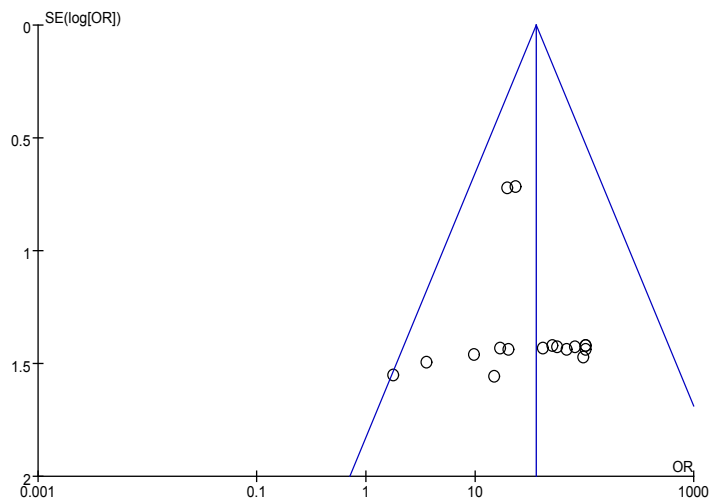

Fig .3. (C) Funnel plot of the association between *C9orf72* repeat expansions and sporadic ALS

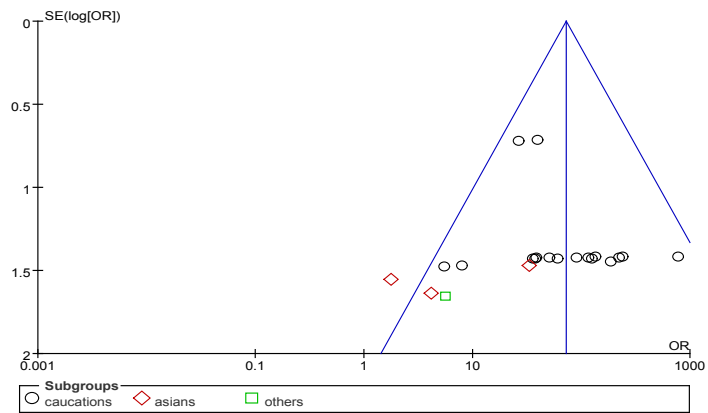

Fig. 3. (D) Funnel plot of the association between *C9orf72* repeat expansions and Caucasian and Asian ALS
