# Supplementary material for: The Association between C9orf72 Repeats and Risk of Alzheimer's Disease and Amyotrophic Lateral Sclerosis: A Meta-Analysis
Source: Parkinsons Dis. 2016 Jun 8;2016:5731734. doi: 10.1155/2016/5731734 (PMC4916312; doi:10.1155/2016/5731734)
Supplement: Supplementary file 1 — The flowchart of the selection of studies, the funnel plot and the detailed characteristics of the included studies are listed in the supplementary materials. [file 5731734.f1.zip]

Archive with 6 entries (6 files):
- Supplementary Fig. 1.pdf
- Supplementary Fig. 2.pdf
- Supplementary Fig. 3.pdf
- Table 1.pdf
- Table 2.pdf
- Table 3.pdf
