# Supplementary figures and images for: The Association betweenC9orf72Repeats and Risk of Alzheimer’s Disease and Amyotrophic Lateral Sclerosis: A Meta-Analysis
Source: Hindawi journal article supplement (doi:10.1155/2016/5731734), 2016-01-01

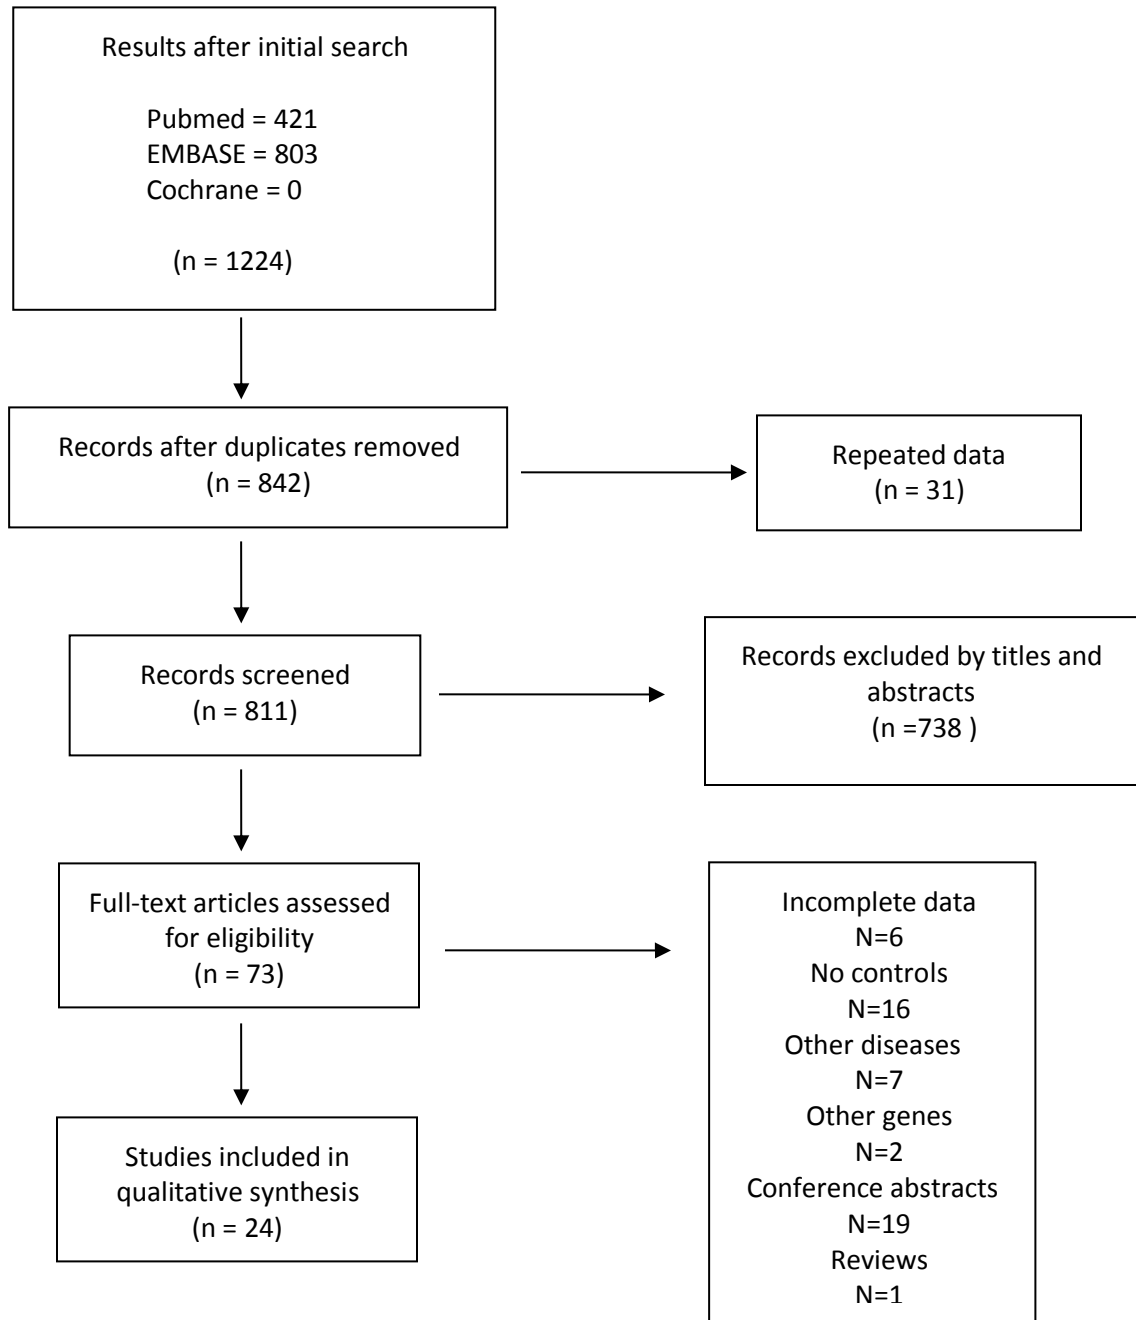

Fig. 2. Flowchart of the selection of studies (ALS)

Supplement: f1 [file 5731734.f1.zip]

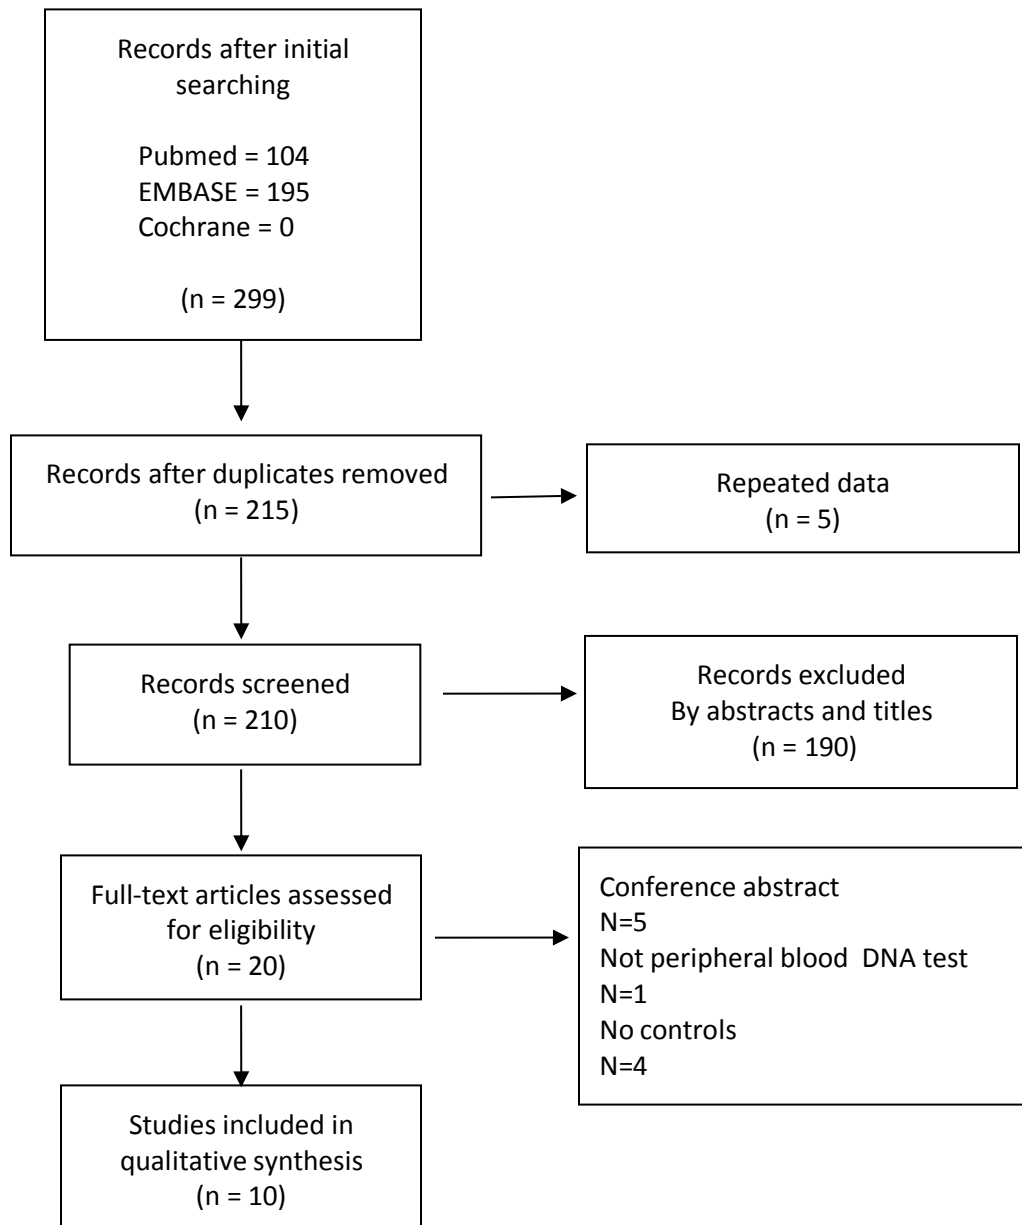

Fig. 1. Flowchart of the selection of studies (AD)

Supplement: f1 [file 5731734.f1.zip]
